# Supplementary material for: Transmission of Methicillin-Resistant Staphylococcus spp. from Infected Dogs to the Home Environment and Owners
Source: Antibiotics (Basel). 2022 May 10;11(5):637. doi: 10.3390/antibiotics11050637 (PMC9137922; doi:10.3390/antibiotics11050637)
Supplement: Supplementary file 1 [file antibiotics-11-00637-s001.zip]

Archive with 4 entries (4 files):
- Table S1 Summary all isolates.xlsx
- Table S2 Virulence genes MRSP, MRSE, MSSP.xlsx
- Table S3 Metadata households.pdf
- Table S4 DB virulence genes S. epidermidis.xlsx
