# Supplementary material for: Transmission of Methicillin-Resistant Staphylococcus spp. from Infected Dogs to the Home Environment and Owners
Source: Antibiotics (Basel). 2022 May 10;11(5):637. doi: 10.3390/antibiotics11050637 (PMC9137922; doi:10.3390/antibiotics11050637)
Supplement: Supplementary file 1 [file antibiotics-11-00637-s001.zip › Table S1 Summary all isolates.xlsx]

## Sheet: Sheet1
Household	Isolate	Sequenced	Host	Location	Sampling	Day	Trimethoprim/sulfamethoxasole	Tetracycline	Fusidic acid	Enrofloxacin	Gentamicin	Clindamycin	Oxacillin	Cefoxitin	Chloramphenicol	Erythromycin	Sequence type	SCCmec	Resistance genes-CARD
A	MRSP	Yes	Dog	Infection	1	1	S	R	S	S	S	S	R	n/a	S	R	258	IVg(2B)	blaZ, dfrG, ermB, mecA, tetM
A	MRSP	No	Dog	Perineum	1	1	S	R	S	S	S	R	R	n/a	S	R
A	MRSP	No	Dog	Mouth	1	1	S	R	S	S	S	R	R	n/a	S	R
A	MRSP	Yes	Human	Nose	1	1	S	R	S	S	S	S	R	n/a	S	R	258	IVg(2B)	blaZ, dfrG, ermB, mecA, tetM
A	MRSP	No	Environment	Food bowl	1	1	S	R	S	S	S	R	R	n/a	S	R
A	MRSP	No	Environment	Sleeping place	1	1	S	R	S	S	S	R	R	n/a	S	R
A	MRSP	No	Environment	Floor	1	1	S	R	S	S	S	R	R	n/a	S	R
A	MRSP	Yes	Environment	Kitchen	1	1	S	R	S	S	S	S	R	n/a	S	R	258	IVg(2B)	blaZ, dfrG, ermB, mecA, tetM
B	MRSP	Yes	Dog	Infection	1	1	R	R	S	R	R	R	R	n/a	S	R	551	Vc(5C2&5)	aac(6'), ant(6'), aph(2"), aph(3'), blaZ, dfrG, ermB, mecA, sat4, tetK, tetM
B	MSSP	Yes	Dog	Perineum	1	1	S	S	S	S	S	S	S	n/a	S	S	-	-	None
B	MRSP	No	Environment	Sleeping place	1	1	R	R	S	R	R	R	R	n/a	S	R
B	MRSP	Yes	Environment	Floor	1	1	R	R	S	R	R	R	R	n/a	S	R	551	Vc(5C2&5)	aac(6'), ant(6'), aph(2"), aph(3'), blaZ, dfrG, ermB, mecA, sat4, tetK, tetM
C	MRSP	No	Dog	Perineum	1	1	R	R	S	R	R	R	R	n/a	S	R
C	MRSP	No	Dog	Mouth	1	1	R	R	S	R	R	R	R	n/a	S	R
C	MRSP	Yes	Dog	Infection	1	1	R	R	S	R	R	R	R	n/a	S	R	-	V(5C2&5)	aac(6'), ant(6'), aph(2"), aph(3'), blaZ, dfrG, ermB, mecA, tetM
C	MRSP	No	Environment	Food bowl	1	1	R	R	S	R	R	R	R	n/a	S	R
C	MRSP	No	Environment	Sleeping place	1	1	R	R	S	R	R	R	R	n/a	S	R
C	MRSP	No	Environment	Floor	1	1	R	R	S	R	R	R	R	n/a	S	R
D	MRSP	Yes	Dog	Infection	1	1	R	S	S	R	R	R	R	n/a	S	R	680	III(3A)	aac(6'), ant(6'), ant(9), aph(2"), aph(3'), blaZ, dfrG, ermB, mecA, sat4,
D	MRSP	No	Dog	Perineum	1	1	R	S	S	R	R	R	R	n/a	S	R
D	MRSP	No	Dog	Mouth	1	1	R	S	S	R	R	R	R	n/a	S	R
D	MRSP	No	Environment	Food bowl	1	1	R	S	S	R	R	R	R	n/a	S	R
D	MRSP	No	Environment	Sleeping place	1	1	R	S	S	R	R	R	R	n/a	S	R
D	MRSP	No	Environment	Floor	1	1	R	S	S	R	R	R	R	n/a	S	R
D	MRSP	No	Environment	Bathroom	1	1	R	S	S	R	R	R	R	n/a	S	R
D	MRSP	Yes	Environment	Kitchen	1	1	R	S	S	R	R	R	R	n/a	S	R	680	III(3A)	aac(6'), ant(6'), ant(9), aph(2"), aph(3'), blaZ, dfrG, ermB, mecA, sat4,
E	MRSP	Yes	Dog	Infection	1	1	R	R	S	S	S	S	R	n/a	S	S	258	IVg(2B)	ant(6'), aph(3'), blaZ, dfrG, mecA, sat4, tetM
E	MRSP	No	Dog	Perineum	1	1	R	R	S	S	S	S	R	n/a	S	S
E	MRSP	No	Environment	Food bowl	1	1	R	R	S	S	S	S	R	n/a	S	S
E	MRSP	No	Environment	Sleeping place	1	1	R	R	S	S	S	S	R	n/a	S	S
E	MRSP	Yes	Environment	Floor	1	1	R	R	S	S	S	S	R	n/a	S	S	258	IVg(2B)	ant(6'), aph(3'), blaZ, dfrG, mecA, sat4, tetM
E	MRSP	No	Contact dog	Perineum/Mouth	1	1	R	R	S	S	S	S	R	n/a	S	S
E	MRSP	No	Contact dog	Perineum/Mouth	1	1	R	R	S	S	S	S	R	n/a	S	S
E	MRSP	No	Contact dog	Perineum/Mouth	1	1	R	R	S	S	S	S	R	n/a	S	S
E	MRSP	No	Contact dog	Perineum/Mouth	1	1	R	R	S	S	S	S	R	n/a	S	S
E	MRSP	No	Contact dog	Perineum/Mouth	1	1	R	R	S	S	S	S	R	n/a	S	S
E	MRSP	Yes	Contact dog	Perineum/Mouth	1	1	R	R	S	S	S	S	R	n/a	S	S	258	IVg(2B)	ant(6'), aph(3'), blaZ, dfrG, mecA, sat4, tetM
E	MRSP	No	Contact dog	Perineum/Mouth	1	1	R	R	S	S	S	S	R	n/a	S	S
E	MRSP	No	Contact dog	Perineum/Mouth	1	1	R	R	S	S	S	S	R	n/a	S	S
E	MRSP	No	Contact dog	Perineum/Mouth	1	1	R	R	S	S	S	S	R	n/a	S	S
E	MRSP	No	Contact dog	Perineum/Mouth	1	1	R	R	S	S	S	S	R	n/a	S	S
F	MRSP	No	Dog	Perineum	1	1	R	R	S	S	R	R	R	n/a	S	R
F	MRSP	Yes	Dog	Infection	1	1	R	R	S	S	R	R	R	n/a	S	R	-	IVg(2B)	aac(6'), ant(6'), aph(2"), aph(3'), blaZ, dfrG, ermB, lsaE, mecA, mefE, tetM
F	MRSP	No	Environment	Food bowl	1	1	R	R	S	S	R	R	R	n/a	S	R
F	MRSP	No	Contact dog	Perineum	1	1	R	R	S	S	R	R	R	n/a	S	R
F	MRSP	No	Contact dog	Infection	1	1	R	R	S	S	R	R	R	n/a	S	R
G	MRSP	Yes	Dog	Infection	1	1	R	R	S	S	S	R	R	n/a	S	R	258	IVg(2B)	ant(6'), aph(3'), blaZ, blaZ, dfrG, ermB, mecA, sat4, tetM
G	MRSP	No	Dog	Perineum	1	1	R	R	S	S	S	R	R	n/a	S	R
G	MRSP	No	Dog	Mouth	1	1	R	R	S	S	S	R	R	n/a	S	R
G	MSSP	Yes	Human	Nose	1	1	R	R	S	S	S	R	S	n/a	S	R	258	-	ant(6'), aph(3'), dfrG, ermB, blaZ,blaZ, sat4, tetM
G	MRSP	No	Environment	Food bowl	1	1	R	R	S	S	S	R	R	n/a	S	R
G	MRSP	No	Environment	Sleeping place	1	1	R	R	S	S	S	R	R	n/a	S	R
G	MRSP	No	Environment	Floor	1	1	R	R	S	S	S	R	R	n/a	S	R
G	MRSP	No	Environment	Bathroom	1	1	R	R	S	S	S	R	R	n/a	S	R
G	MRSP	Yes	Environment	Kitchen	1	1	R	R	S	S	S	R	R	n/a	S	R	258	IVg(2B)	ant(6'), aph(3'), blaZ, blaZ, dfrG, ermB, mecA, sat4, tetM
H	MRSE	Yes	Dog	Infection	1	1	S	S	R	S	S	S	R	R	S	R	640	IVd(2B)	ant(4'), blaZ, dfrC, fusB, mecA, mgrA, msrA, norA
H	MRSE	No	Dog	Perineum	1	1	S	S	R	S	S	I	R	R	S	R
H	MRSE	Yes	Human	Nose	1	1	S	S	R	S	S	S	R	R	S	R	640	IVd(2B)	ant(4'), blaZ, dfrC, fusB, mecA, mgrA, msrA, norA
H	MRSE	No	Environment	Food bowl	1	1	S	S	R	S	S	S	R	R	S	R
H	MRSE	No	Environment	Sleeping place	1	1	S	S	R	S	S	S	R	R	S	R
H	MRSE	No	Environment	Floor	1	1	S	S	R	S	S	I	R	R	S	R
H	MRSE	Yes	Environment	Kitchen	1	1	S	S	R	S	S	S	R	R	S	R	640	IVd(2B)	ant(4'), blaZ, dfrC, fusB, mecA, mgrA, msrA, norA
Follow up sampling isolates
A	MRSP	Yes	Dog	Infection	2	1	S	R	S	S	S	R	R	n/a	S	R	258	IVg(2B)	blaZ, dfrG, ermB, mecA, tetM
A	MRSP	No	Dog	Infection	2	3	S	R	S	S	S	S	R	n/a	S	R
A	MRSP	No	Dog	Infection	2	4	S	R	S	S	S	R	R	n/a	S	R
A	MRSP	Yes	Dog	Infection	2	5	S	R	S	S	S	R	R	n/a	S	R	258	IVg(2B)	blaZ, dfrG, ermB, mecA, tetM
A	MRSP	No	Dog	Perineum	2	1	S	R	S	S	S	R	R	n/a	S	R
A	MRSP	No	Dog	Perineum	2	2	S	R	S	S	S	R	R	n/a	S	R
A	MSSP	Yes	Human	Nose	2	1	S	S	S	S	S	S	S	n/a	S	S	-	-	None
A	MRSP	No	Environment	Floor	2	1	S	R	S	S	S	S	R	n/a	S	R
A	MRSP	No	Environment	Floor	2	2	S	R	S	S	S	S	R	n/a	S	R
A	MRSP	No	Environment	Floor	2	4	S	R	S	S	S	R	R	n/a	S	R
A	MRSP	Yes	Environment	Bathroom	2	1	S	R	S	S	S	S	R	n/a	S	R	258	IVg(2B)	blaZ, dfrG, ermB, mecA, tetM
A	MRSP	Yes	Dog	Infection	3	1	S	R	S	S	S	R	R	n/a	S	R	258	IVg(2B)	blaZ, dfrG, ermB, mecA, tetM
A	MRSP	No	Dog	Infection	3	2	S	R	S	S	S	R	R	n/a	S	R
A	MRSP	No	Dog	Infection	3	3	S	R	S	S	S	R	R	n/a	S	R
A	MRSP	No	Dog	Infection	3	4	S	R	S	S	S	R	R	n/a	S	R
A	MRSP	Yes	Dog	Perineum	3	5	S	R	S	S	S	R	R	n/a	S	R	258	IVg(2B)	blaZ, dfrG, ermB, mecA, tetM
A	MRSP	No	Dog	Perineum	3	2	S	R	S	S	S	R	R	n/a	S	R
A	MRSP	No	Dog	Perineum	3	3	S	R	S	S	S	S	R	n/a	S	R
A	MRSP	No	Dog	Perineum	3	5	S	R	S	S	S	R	R	n/a	S	R
A	MRSP	No	Environment	Floor	3	2	R	R	S	S	S	R	R	n/a	S	R
A	MRSP	Yes	Environment	Floor	3	3	S	R	S	S	S	I	R	n/a	S	R	258	IVg(2B)	blaZ, dfrG, ermB, mecA, tetM
A	MRSP	No	Environment	Bathroom	3	2	S	R	S	S	S	R	R	n/a	S	R
B	MRSP	Yes	Dog	Infection	2	1	R	R	S	R	R	R	R	n/a	S	R	551	Vc(5C2&5)	aac(6'), ant(6'), aph(2"), aph(3'), blaZ, dfrG, ermB, mecA, sat4, tetK, tetM
B	MSSP	Yes	Human	Throat	2	2	S	S	S	S	S	S	S	n/a	S	S	-	-	None
B	MRSP	Yes	Environment	Floor	2	1	R	R	S	R	R	R	R	n/a	S	R	551	Vc(5C2&5)	aac(6'), ant(6'), aph(2"), aph(3'), blaZ, dfrG, ermB, mecA, sat4, tetK, tetM
B	MRSP	No	Environment	Floor	2	2	R	R	S	R	R	R	R	n/a	S	R
B	MRSP	No	Environment	Floor	2	3	R	R	S	R	R	R	R	n/a	S	R
B	MRSP	No	Environment	Floor	2	4	R	R	S	R	R	R	R	n/a	S	R
B	MRSP	No	Environment	Bathroom	2	2	R	R	S	R	R	R	R	n/a	S	R
B	MRSP	No	Environment	Kitchen	2	2	R	R	S	R	R	R	R	n/a	S	R
B	MRSP	Yes	Environment	Kitchen	2	4	R	R	S	R	R	R	R	n/a	S	R	551	Vc(5C2&5)	aac(6'), ant(6'), aph(2"), aph(3'), blaZ, dfrG, ermB, mecA, sat4, tetK, tetM
B	MSSP	Yes	Human	Throat	3	2	S	S	S	S	S	S	S	n/a	S	S	-	-	None
B	MRSP	Yes	Dog	Perineum	3	2	R	R	S	R	R	R	R	n/a	S	R	551	Vc(5C2&5)	aac(6'), ant(6'), aph(2"), aph(3'), blaZ, dfrG, ermB, mecA, sat4, tetK, tetM
B	MRSP	No	Environment	Floor	3	1	R	R	S	R	R	R	R	n/a	S	R
B	MRSP	No	Environment	Floor	3	2	R	R	S	R	R	R	R	n/a	S	R
B	MRSP	No	Environment	Floor	3	3	R	R	S	R	R	R	R	n/a	S	R
B	MRSP	No	Environment	Floor	3	4	R	R	S	R	R	R	R	n/a	S	R
B	MRSP	Yes	Environment	Floor	3	5	R	R	S	R	R	R	R	n/a	S	R	551	Vc(5C2&5)	aac(6'), ant(6'), aph(2"), aph(3'), blaZ, dfrG, ermB, mecA, sat4, tetK, tetM
B	MRSP	Yes	Environment	Kitchen	3	1	R	R	S	R	R	R	R	n/a	S	R	551	Vc(5C2&5)	aac(6'), ant(6'), aph(2"), aph(3'), blaZ, dfrG, ermB, mecA, sat4, tetK, tetM
C	MRSP	Yes	Environment	Floor	2	1	R	R	S	R	R	R	R	n/a	S	R	-	V(5C2&5)	aac(6'), ant(6'), aph(2"), aph(3'), blaZ, dfrG, ermB, mecA, tetM
C	MRSP	Yes	Environment	Sofa	2	1	S	R	S	R	R	S	R	n/a	S	S	-	V(5C2&5)	aac(6'), aph(2"), blaZ, mecA, tetM
