# Supplementary material for: Transmission of Methicillin-Resistant Staphylococcus spp. from Infected Dogs to the Home Environment and Owners
Source: Antibiotics (Basel). 2022 May 10;11(5):637. doi: 10.3390/antibiotics11050637 (PMC9137922; doi:10.3390/antibiotics11050637)
Supplement: Supplementary file 1 [file antibiotics-11-00637-s001.zip › Table S2 Virulence genes MRSP, MRSE, MSSP.xlsx]

## Sheet: Sheet1
				Adhesion				Biofilm				Toxin												Exoenzyme										Genetic regulator
	Household	Isolate	Source	ebpS	spsD	spsL	spsO	icaA	icaB	icaC	icaD	bacSp222	expB	hlb	lukF-I	lukS-I	mazG_ST71	nanB	sec3	se-int	siet	speta	virE1	clpC	clpP	clpP_ST71	clpX	coa	hrtA	lip	mbl	nucA	nucC	agrA	agrB	agrC	agrD2	agrD3	arlR	arlS	lytR	lytS	rot	saeR	saeS	sarA	sarR	sarZ	srrA
	A	MRSP	Dog, human	X	X			X	X	X	X			X	X	X		X		X	X	X		X	X		X	X	X	X		X	X	X	X	X	X		X	X	X	X	X	X	X	X	X	X	X
	A	MSSP	Dog, human	X	X			X	X	X	X	X	X	X	X	X		X	X	X	X	X		X	X		X	X	X	X		X	X	X	X	X	X		X	X	X	X	X	X	X	X	X	X	X
	B	MRSP	Dog	X		X		X	X	X	X			X	X	X				X	X	X		X	X		X	X	X	X		X	X	X	X	X		X	X	X	X	X	X	X	X	X	X	X	X
	B	MSSP	Dog, human	X	X	X	X	X	X	X	X	X	X	X	X	X		X	X	X	X	X		X	X		X	X	X	X		X	X	X	X	X	X		X	X	X	X	X	X	X	X	X	X	X
	C	MRSP	Dog	X	X			X	X	X	X			X	X	X	X	X		X	X	X		X	X	X	X	X	X	X	X	X	X	X	X	X	X		X	X	X	X	X	X	X	X	X	X	X
	C	MRSP	Environment	X	X			X	X	X	X			X	X	X	X	X		X	X	X		X	X	X	X	X	X	X	X	X	X	X	X	X	X		X	X	X	X	X	X	X	X	X	X	X
	D	MRSP	Dog	X		X		X	X	X	X			X	X	X	X			X	X	X	X	X	X	X	X	X	X	X	X	X	X	X	X	X		X	X	X	X	X	X	X	X	X	X	X	X
	E	MRSP	Dog	X	X			X	X	X	X			X	X	X		X		X	X	X		X	X		X	X	X	X		X	X	X	X	X	X		X	X	X	X	X	X	X	X	X	X	X
	F	MRSP	Dog	X	X			X	X	X	X		X	X	X	X	X	X		X	X	X		X	X	X	X	X	X	X	X	X	X	X	X	X	X		X	X	X	X	X	X	X	X	X	X	X
	G	MRSP	Dog	X	X			X	X	X	X			X	X	X		X		X	X	X	X	X	X		X	X	X	X		X	X	X	X	X	X		X	X	X	X	X	X	X	X	X	X	X
	G	MSSP	Dog, human	X	X			X	X	X	X			X	X	X		X		X	X	X	X	X	X		X	X	X	X		X	X	X	X	X	X		X	X	X	X	X	X	X	X	X	X	X
	Household	Isolate	Source	Adhesion								Biofilm		Toxin			Exoenzyme					Genetic regulator
	H	MRSE	Dog, human	aae	atlE	bhp	ebpS	fbe	sdrF	sdrG	sdrH	sepA	sspA	hla	hlb	hld	clpP	clpX	gehC	gehD	htrA	agrA
[truncated: 11 more columns]
