# Supplementary material for: Transmission of Methicillin-Resistant Staphylococcus spp. from Infected Dogs to the Home Environment and Owners
Source: Antibiotics (Basel). 2022 May 10;11(5):637. doi: 10.3390/antibiotics11050637 (PMC9137922; doi:10.3390/antibiotics11050637)
Supplement: Supplementary file 1 [file antibiotics-11-00637-s001.zip › Table S4 DB virulence genes S. epidermidis.xlsx]

## Sheet: Sheet1
Gene	Accession number	Locus tag
sdrF	NZ_CP013943.1	SE1UMMC_RS00135
sdrG	CP000029.1	SERP0207
sdrH	CP000029.1	SERP1487
sesD(bhp)	CP000029.1	SERP2392
sesF(aap)	CP000029.1	SERP2398
ebh	NZ_CP013943.1	SE1UMMC_RS05470
ebpS	NZ_CP013943.1	SE1UMMC_RS05660
atlE	CP000029.1	SERP0636
fbe	CP000029.1	SERP0775
icaA	NZ_CP013943.1	SE1UMMC_RS12330
icaA_2	CP000029.1	SERP2293
icaB	NZ_CP013943.1	SE1UMMC_RS12340
icaC	NZ_CP013943.1	SE1UMMC_RS12345
icaD	NZ_CP013943.1	SE1UMMC_RS12335
clpP	CP009046.1	DP17_1848
clpX	CP009046.1	DP17_305
aur	CAJPVF010000073.1	NVI_SEPI_01848
arcA	NZ_CP013943.1	SE1UMMC_RS12115
agrA	CP009046.1	DP17_581
gehC	NZ_CP013943.1	SE1UMMC_RS12350
gehD	NZ_CP013943.1	SE1UMMC_RS12790
sepA	CP009046.1	DP17_1151
hla/yidD	NZ_CP013943.1	SE1UMMC_RS07090
hlb	CP000029.1	SERP2544
hld	NZ_CP013943.1	SE1UMMC_RS08470
aae	NZ_CP013943.1	SE1UMMC_RS00540
htrA	CP000029.1	SERP1292
sspA	CP000029.1	SERP1397
